# Supplementary material
Source: Springer Nature journal article supplement (https://www.springermedizin.de/resource/supplementary/13020_2012_185_MOESM1_ESM.pdf/9641154)

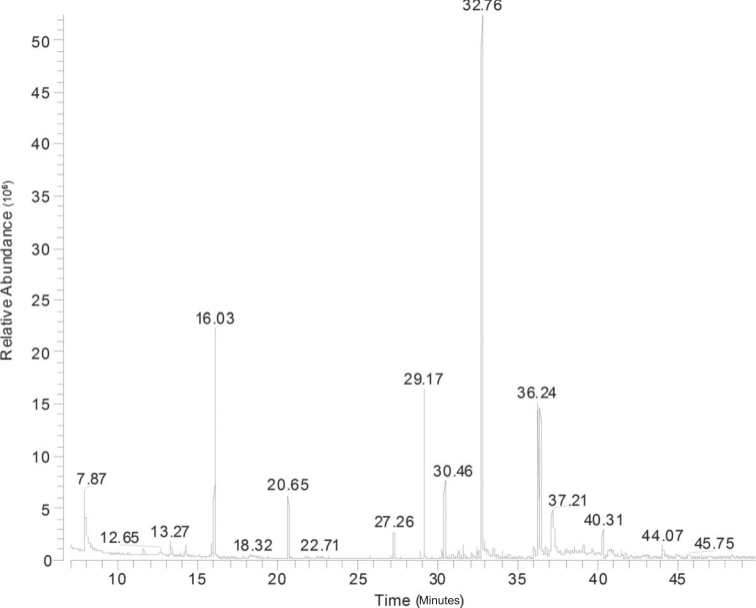

Supplement: MOESM1 [file 9641154]
